# Supplementary material for: Protective Role of Ice Barriers: How Reproductive Organs of Early Flowering and Mountain Plants Escape Frost Injuries
Source: MDPI journal article supplement (doi:10.3390/plants10051031), 2021-05-20
Supplement: s1 [file s1]

**Supplementary Materials:** The following are available online at [www.mdpi.com/xxx/s1](http://www.mdpi.com/xxx/s1), Figure S1: Ice nucleation temperatures, Table S1: Ice nucleation temperatures (Statistical results).

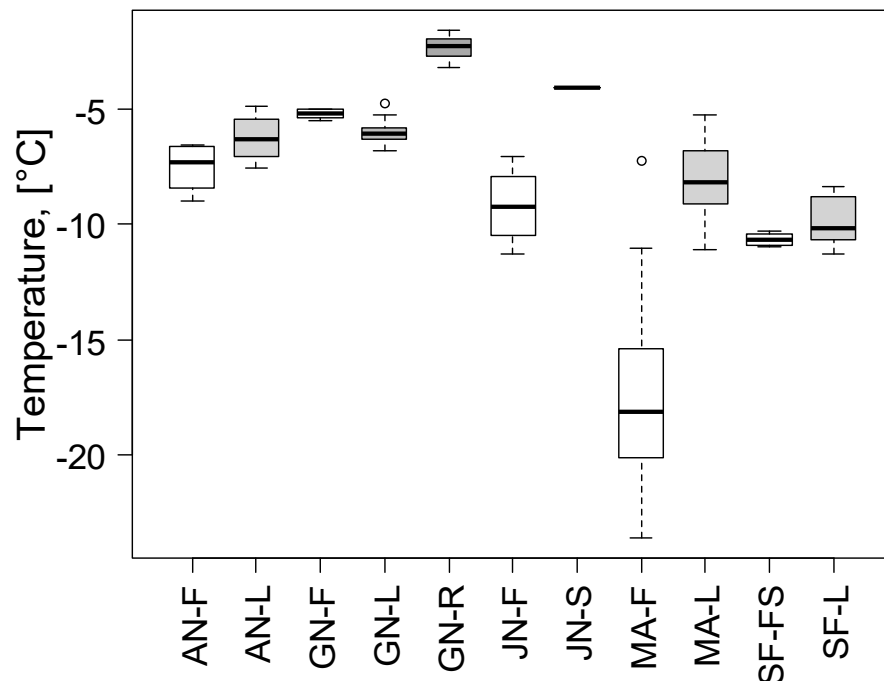

**Supplementary Figure S1. Ice nucleation temperatures** determined in flowers (“F”, white boxes), leaves (“L”, light-grey), roots (“R”, dark-grey), stems (“S”), and/or inflorescences together with stalks (“FS”, white) of *Anemone nemorosa* L. (“AN”), *Galanthus nivalis* L. (“GN”), *Jasminum nudiflorum* Lindl. (“JN”), *Muscari* sp. (“MA”), and *Scilla forbesii* (Baker) Speta (“SF”). Asterisks indicate significant differences ( $p < 0.05$ ) from the intercept in linear model, where the plant part of a species was regressed on ice nucleation temperatures. Box plots show medians and the 25<sup>th</sup> and 75<sup>th</sup> percentiles. Dots outside the  $1.5 \times$  interquartile ranges represent outliers.

**Supplementary Table S1. Coefficients of a linear model** relating the plant part of a species to ice nucleation temperature. Flowers of *A. nemorosa* were used as baseline levels in the model.

| Plant species and Part                       | Coefficient $\pm$ SE | t value | p-value          |
|----------------------------------------------|----------------------|---------|------------------|
| <i>Anemone nemorosa</i> L. flowers           | $-7.6 \pm 1.3$       | -5.627  | <b>&lt;0.001</b> |
| <i>Anemone nemorosa</i> L. leaves            | $-6.3 \pm 1.9$       | 0.672   | 0.502            |
| <i>Galanthus nivalis</i> L. flowers          | $-5.2 \pm 1.6$       | 1.482   | 0.139            |
| <i>Galanthus nivalis</i> L. leaves           | $-6.1 \pm 1.5$       | 1.010   | 0.313            |
| <i>Galanthus nivalis</i> L. roots            | $-2.4 \pm 2.1$       | 2.529   | <b>0.012</b>     |
| <i>Jasminum nudiflorum</i> Lindl. flowers    | $-9.2 \pm 1.9$       | -0.883  | 0.378            |
| <i>Jasminum nudiflorum</i> Lindl. shoot      | $-4.1 \pm 3.0$       | 1.150   | 0.251            |
| <i>Muscari</i> sp. flowers                   | $-17.9 \pm 1.4$      | -7.637  | <b>&lt;0.001</b> |
| <i>Muscari</i> sp. leaves                    | $-8.3 \pm 1.6$       | -0.472  | 0.637            |
| <i>Scilla forbesii</i> (Baker) Speta flowers | $-10.7 \pm 1.9$      | -1.647  | 0.101            |
| <i>Scilla forbesii</i> (Baker) Speta leaves  | $-9.9 \pm 1.8$       | -1.294  | 0.197            |
